## Correction: Tissue biodistribution and tumor targeting of near-infrared labelled anti-CD38 antibody-drug conjugate in preclinical multiple myeloma

Nicholas Cho<sup>1,2</sup>, Sooah Ko<sup>2</sup> and Monica Shokeen<sup>1,2,3</sup>

<sup>1</sup>Department of Radiology, Washington University School of Medicine, St. Louis, MO, USA

<sup>2</sup>Department of Biomedical Engineering, Washington University in St. Louis, St. Louis, MO, USA

<sup>3</sup>Alvin J. Siteman Cancer Center, Washington University School of Medicine and Barnes-Jewish Hospital, St. Louis, MO, USA

**Published:** April 11, 2025

**Copyright:** © 2025 Cho et al. This is an open access article distributed under the terms of the [Creative Commons Attribution License](#) (CC BY 4.0), which permits unrestricted use, distribution, and reproduction in any medium, provided the original author and source are credited.

**This article has been corrected:** Oncotarget’s investigation of the paper is now complete. We’ve determined that in Figure 3A, the Day 0 representative image of MM.1S SQ mice in the “DARA-IR” group was unintentionally duplicated from the Day 2 image, taken before the fluorescent imaging. This error happened during the figure assembly process. The authors have removed the Day 0 images for both groups of mice. As stated in the Figure 3A caption, the figure is intended to show mice at days 2 and 9 post-dye administration. The authors declare that these modifications to the figures do not change the results or conclusions of the paper.

Original article: Oncotarget. 2021; 12:2039–2050. <https://doi.org/10.18632/oncotarget.28074>

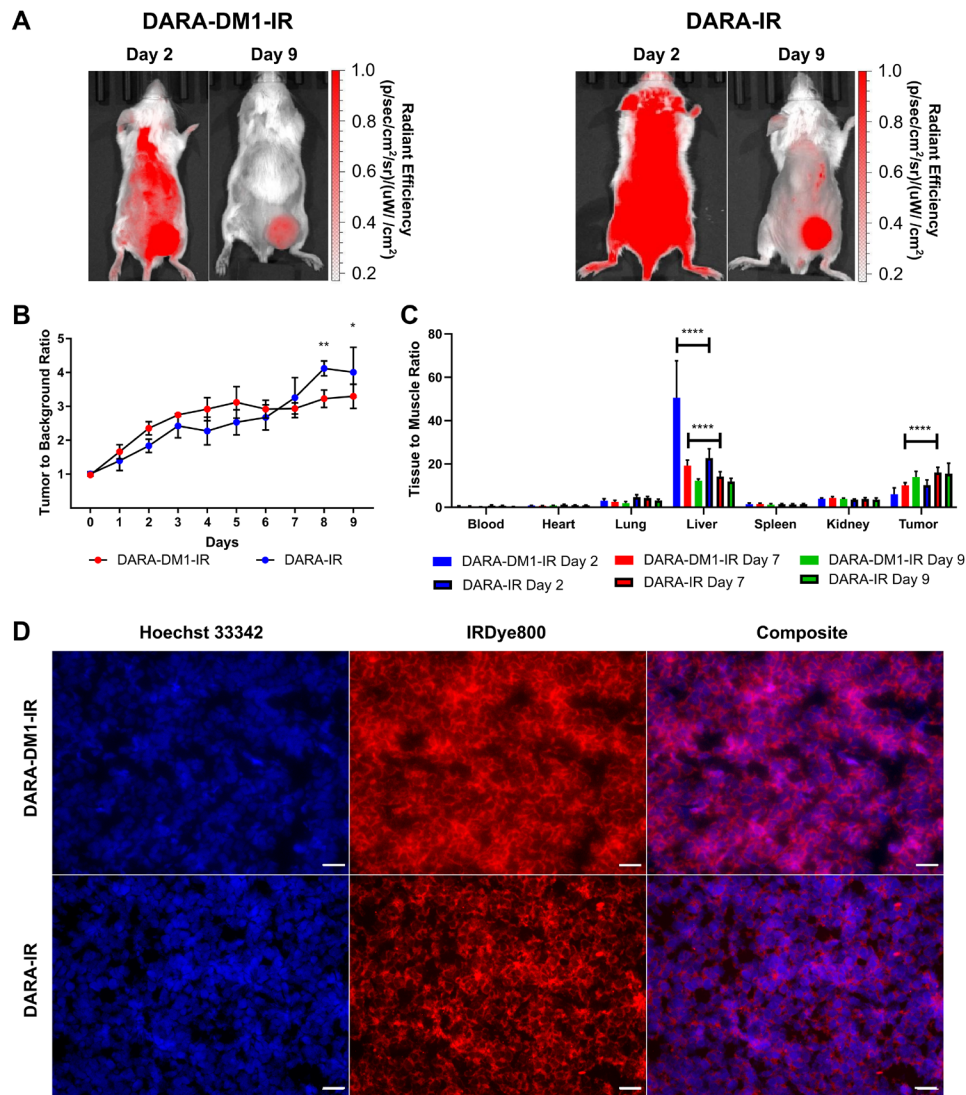

**Figure 3: High contrast observed with DARA-DM1-IR at longer time points in MM.1S SQ mice.** (A) Representative IRDye800 in vivo images of MM.1S SQ mice 2 and 9 days post administration of DARA-DM1-IR and DARA-IR. (B) Plot of calculated Tumor to Background Ratios (TBRs) in MM.1S SQ mice across individual time points following administration of DARA-DM1-IR and DARA-IR. Background is defined as the non-tumor, contralateral left flank of the mouse. Repeated measures two-way ANOVA followed by Sidak's multiple comparison's test was performed on TBR data.  $n = 3-4$ /group. (C) Normalized biodistribution (defined as tissue to muscle ratio (TMR)) of DARA-DM1-IR 2, 7 and 9 days after administration of fluorescent conjugate.  $n = 3-4$ /group. Two-way ANOVA followed by Sidak's multiple comparisons test was performed on biodistribution data. (D) Immunohistochemistry of excised tumor sections from mice injected with DARA-DM1-IR and DARA-IR. Nuclear stain was performed with Hoechst 33342. Magnification: 40 $\times$ ; Scale bar: 100  $\mu$ m. \* $p < 0.05$ ; \*\* $p < 0.01$ ; \*\*\* $p < 0.0001$ . Error bars represent standard deviation.
